# Supplementary material for: Common Bean Subtelomeres Are Hot Spots of Recombination and Favor Resistance Gene Evolution
Source: Front Plant Sci. 2018 Aug 14;9:1185. doi: 10.3389/fpls.2018.01185 (PMC6102362; doi:10.3389/fpls.2018.01185)
Supplement: Supplementary file 10 [file Table_10.XLS]

## Sheet: Feuil1
Table S10: Markers used in this study
Marker/probe	Forward primer	Forward primer sequence	Reverse primer	Reverse primer sequence	References
Leg208	Leg208 fw	5'-AGGAARGCAGTTGATTATACRAGCACAGTTGTGCG-3'	Leg208 rv	5'-CAWCGATTTTTATTYAGAGATGTATGAACAAAT-3'	Hougaard et al. (2008)
Leg220	Leg220 fw	5'-ATGCCACCTGGTGCAGTTACWCTGGATGATGTGG-3'	Leg220 rv	5'-CTGGGAGGWGAACCTGAAGACYCAGGATCAGTGAC-3'	Hougaard et al. (2008)
SCH20	SCH20-1	5'-GGGAGACATCCATCAGACAACTCC-3'	SCH20-2	5'-GGGAGACATCTTCATTTGATATGC-3'	Geffroy et al. (1998)
47b16-f1	47b16-f1.1	5'-AAAAGGGGTTGAGAAATCAC-3'	47b16-f1.2	5'-AGGATCCTTCTGTAACTCTGG-3'	Chen et al., (2010)
68o6-f1	68o6-f1.1	5'-GCCTGATGCCAACAAGTACA-3'	68o6-f1.1	5'-AAGGATGAACTGCCTCATGC-3'	Chen et al., (2010)
34g17-f1	34g17-f1.1	5'-GCGACATCACTCATCAATCG-3'	34g17-f1.2	5'-GGCAAAATAAATCTCCAAGG-3'	Chen et al., (2010)
76g17-f1	76g17-f1.1	5'-GATCACCCTGACTTAGCCCTC -3'	76g17-f1.2	5'-GGATGAAGAAGGTCTTGC -3'	Chen et al., (2010)
118d24-r05	118d24-r05S	5'-TCCAGCAAGCCAACTAATCC -3'	118d24-r05A	5'-TTGCAGTTTCCACTCCTCCT -3'	Chen et al., (2010)
CNL1	CNL1-F	5'-AGGTTGGGTTTGTGTTTCA -3'	CNL1-R	5'-CGACTTAGAGTTATCATCTC-3'	Chen et al., (2010)
CNL3/4	CNL3/4-F	5'-CTTGACACAATTACCAGC-3'	CNL3/4-R	5'-GTTGAGGATTAGAACTTTGA-3'	Chen et al., (2010)
15g20-f1	15g20-f1.1	5'-CCTGAAGCATGCATTGTACTC-3'	15g20-f1.2	5'-AAGGCAGCCTAAACCTCCTC-3'	this study
231b2-f06	231b2-f06S	5'-AGGATGAACCCAATCCCAAT-3'	231b2-f06A	5'-GATGCTCCAACGCTGAAAAT-3'	this study
69f22-f1	69f22-f1S	5'-AACAACGTCAATCAAGGCAAC-3'	69f22-fA	5'-AGTCACGCTCATAACCTTTCTT-3'	this study
7i9-f1	7i9-f1S	5'-CCTGTTTTGCTCCATCTGCT-3'	7i9-f1A	5'-TTGTGGGTTGCTGCTGTTAG-3'	this study
